# Supplementary material for: PgtE protease enables virulent Salmonella to evade C3-mediated serum and neutrophil killing
Source: PubMed Central journal article supplement — bioRxiv. 2024 Nov 5:2024.11.05.622138. Preprint. [Version 1] doi: 10.1101/2024.11.05.622138 (PMC11580845; doi:10.1101/2024.11.05.622138), 2024-11-05
Supplement: NIHPP2024.11.05.622138v1-supplement-1.pdf [file NIHPP2024.11.05.622138v1-supplement-1.pdf]

1044 **Supplementary Table 1**  
1045

| Designation                                           | Genotype                                                                                                                                                                                                                 | Reference or Source                                       |
|-------------------------------------------------------|--------------------------------------------------------------------------------------------------------------------------------------------------------------------------------------------------------------------------|-----------------------------------------------------------|
| <b><i>Salmonella enterica</i> serovar Typhimurium</b> |                                                                                                                                                                                                                          |                                                           |
| IR715                                                 | ATCC 14028s wild-type, spontaneous Nal <sup>R</sup>                                                                                                                                                                      | Stojiljkovic et al, J. Bacteriol. 177(5):1357-1366 (1995) |
| JB10                                                  | IR715 $\Delta$ <i>pgtE::tetRA</i> (Nal <sup>R</sup> , Tet <sup>R</sup> )                                                                                                                                                 | This study                                                |
| ML27                                                  | IR715 <i>pgtE</i> -FLAG (Nal <sup>R</sup> )                                                                                                                                                                              | This study                                                |
| LAKglmS                                               | <i>SL1344 glmS::Ptrc-mCherryST::FCF</i> (Strep <sup>R</sup> , Cm <sup>R</sup> )                                                                                                                                          | Knodler et al, Cell Host Microbe. 16(2):249-256 (2014)    |
| LAKML2                                                | IR715 <i>glmS::Ptrc-mCherryST::FRT</i> (Nal <sup>R</sup> )                                                                                                                                                               | This study                                                |
| D23580                                                | D23580 wild-type                                                                                                                                                                                                         | Kingsley et al, Genome Research. 19:2279–2287 (2009)      |
| SPN1113                                               | D23580 $\Delta$ <i>pgtE::tetRA</i>                                                                                                                                                                                       | This study                                                |
| <b><i>Escherichia coli</i></b>                        |                                                                                                                                                                                                                          |                                                           |
| CC118 $\lambda$ <i>pir</i>                            | F- <i>araD139</i> $\Delta$ ( <i>ara, leu</i> )7697 $\Delta$ <i>lacX74 phoAD20 galE galK thi rpsE rpoB argE<sup>am</sup> recA1</i> $\lambda$ <i>pir</i>                                                                   | Herrero et al, J Bacteriol. 172(11):6557-67 (1990)        |
| S17-1 $\lambda$ <i>pir</i>                            | F- <i>recA thi pro rK- mK+ RP4:2-Tc::MuKm Tn7</i> $\lambda$ <i>pir</i>                                                                                                                                                   | Herrero et al, J Bacteriol. 172(11):6557-67 (1990)        |
| XL1-Blue                                              | <i>recA1 endA1 gyrA96 thi-1 hsdR17 supE44 relA1 lac</i> [F <i>proAB lac<sup>q</sup>Z</i> $\Delta$ M15 Tn10 (Tet <sup>R</sup> )]                                                                                          | Agilent                                                   |
| DH5 $\alpha$ MCR                                      | F- <i>mcrA</i> $\Delta$ ( <i>mrr-hsdRMS-mcrBC</i> ) $\phi$ 80 <i>lacZ</i> $\Delta$ M15 $\Delta$ ( <i>lacZYA-argF</i> )U169 <i>deoR recA1 endA1 phoA supE44</i> $\lambda$ - <i>thi-1 gyrA96 relA1</i>                     | Gibco BRL                                                 |
| One TOP10 Shot                                        | F- <i>mcrA</i> $\Delta$ ( <i>mrr-hsdRMS-mcrBC</i> ) $\phi$ 80 <i>lacZ</i> $\Delta$ M15 $\Delta$ <i>lacX74 recA1 araD139</i> $\Delta$ ( <i>ara, leu</i> )7697 <i>galU galK rpsL</i> (Str <sup>R</sup> ) <i>endA1 nupG</i> | Invitrogen                                                |

1046  
1047

1048 **Supplementary Table 2**

1049

| Designation                               | Relevant characteristics                                                                                                     | Reference or Source                                                      |
|-------------------------------------------|------------------------------------------------------------------------------------------------------------------------------|--------------------------------------------------------------------------|
| pCP20                                     | Ap <sup>R</sup> , temperature-sensitive, FLP recombinase system                                                              | Datsenko et al, Proc. Natl. Acad. Sci. USA. 97, 6640-6645 (2000)         |
| pWSK29                                    | Ap <sup>R</sup> , MCS, <i>lacZa</i>                                                                                          | Wang et al, Gene. 100, 195-199 (1991)                                    |
| pWSK29:: <i>pgtE</i>                      | Ap <sup>R</sup> Tet <sup>R</sup> , pWSK29:: <i>pgtE</i> ( <i>pgtE</i> complementation)                                       | This study                                                               |
| pWSK29:: <i>pgtE</i> -D206A               | Ap <sup>R</sup> Tet <sup>R</sup> , pWSK29:: <i>pgtE</i> (D206A) ( <i>PgtE</i> inactive allele)                               | This study                                                               |
| pRDH10                                    | Cm <sup>R</sup> Tet <sup>R</sup> , <i>SacB</i> (levansucrase: Sucrose sensitivity)                                           | Kingsley et al, Applied and Environmental Microbiology, 1610-1618 (1999) |
| pRDH10:: <i>pgtE</i> -FLAG                | Cm <sup>R</sup> Tet <sup>S</sup> , <i>SacB</i> , pRDH10:: <i>pgtE</i> -FLAG ( <i>pgtE</i> -FLAG Tag)                         | This study                                                               |
| pCR-Blunt II-TOPO                         | Kan <sup>R</sup> , MCS                                                                                                       | Invitrogen                                                               |
| pGP704                                    | Ap <sup>R</sup> , MCS, <i>oriR6K</i> , <i>mobRP4</i>                                                                         | Miller et al, J. Bacteriology. 170(6):2575-2583 (1988)                   |
| pSPN23                                    | Ap <sup>R</sup> Tet <sup>R</sup> , pBluescriptII KS+:: <i>tetRA</i> ( <i>tetRA</i> cassette)                                 | Raffatellu et al, Cell Host Microbe. 5(5):476-86 (2009)                  |
| pCRII:: <i>pgtE</i> -LBRB                 | Kan <sup>R</sup> , pCR-Blunt II-TOPO:: <i>pgtE</i> -LBRB ( $\Delta$ <i>pgtE</i> cassette)                                    | This study                                                               |
| pGP704:: <i>pgtE</i> -LBRB                | Ap <sup>R</sup> , pGP704:: <i>pgtE</i> -LBRB ( $\Delta$ <i>pgtE</i> cassette)                                                | This study                                                               |
| pGP704:: <i>pgtE</i> -LBRB:: <i>tetRA</i> | Ap <sup>R</sup> Tet <sup>R</sup> , pGP704_ <i>pgtE</i> _LBRB:: <i>tetRA</i> ( $\Delta$ <i>pgtE</i> :: <i>tetRA</i> cassette) | This study                                                               |
| pP <sub><i>pgtE</i></sub> - <i>gfp</i>    | Ap <sup>R</sup> , P <sub><i>pgtE</i></sub> - <i>gfp</i> mut3.1 ( <i>pgtE</i> transcriptional reporter plasmid)               | This study                                                               |
| pMPM-A3 $\Delta$ Plac                     | Ap <sup>R</sup> , P15A ori                                                                                                   | Ibarra et al., Microbiology Apr;156(Pt 4):1120-1133 (2010)               |

1050

1051

### Supplementary Table 3

1052

| Designation        | Purpose                                            | Primer sequence (5' to 3')             | Reference or Source |
|--------------------|----------------------------------------------------|----------------------------------------|---------------------|
| pgtE_LB_for        | Amplifying <i>pgtE</i> upstream region             | ATCAGCAGAGATCATCATGG                   | This study          |
| pgtE_RB_rev        | Amplifying <i>pgtE</i> downstream region           | AATTGAAGACGCGCTACG                     | This study          |
| pgtE_LB_r_fus*     | pCRII_ <i>pgtE</i> _LBRB fusion                    | TGACAAGATGGCTTCTAGACCACATCGG           | This study          |
| pgtE_RB_f_fus *    |                                                    | GTCTAGAAGCCATCTTGTCAAATCGTCGG          | This study          |
| pgtE_LB_f_Sall*    | pWSK29_ <i>pgtE</i> _compl                         | GTCGACAATCTCGGCTATACCTTTGG             | This study          |
| pgtE_RB_r_EcoRO*   |                                                    | GATTCCCGTTATCTCCATCAACTGG              | This study          |
| pgtE_RB_r_seq      | pCRII_ <i>pgtE</i> _LBRB sequencing                | CGTTGAAGAGTATGAGCGAC                   | This study          |
| pgtE_pres_for      | Colony screening PCR                               | CACCGCTGGTTTTATCTATG                   | This study          |
| pgtE_pres_rev      |                                                    | ACGTCTCTCCTGATAGCGTC                   | This study          |
| tetRA_pres_for     | PCR confirmation of <i>tetRA</i> cassette presence | TTCGGAAGATATCGCTAACC                   | This study          |
| tetRA_pres_rev     |                                                    | TAAAGCACCTTGCTGATGAC                   | This study          |
| tetR_int_rev       | <i>tetRA</i> cassette presence                     | CAGAGCCAGCCTTCTTATTC                   | This study          |
| tetA_int_for       |                                                    | GATGACCTTCATGTTAACCC                   | This study          |
| pgtE_for_compl     | <i>pgtE</i> complementation                        | TTATGACCGATGACATCCC                    | This study          |
| pgtE_rev_compl     |                                                    | AATGCGTCAAGTTCTCTGG                    | This study          |
| PpgtE-XbaI-F*      | <i>pgtE</i> transcriptional reporter plasmid       | GCTCTAGAACGAATTAATGAAAGTGGC            | This study          |
| PpgtE-SmaI-R*      |                                                    | TCCCCCGGGATCATCATTACTGCAATAGCA         | This study          |
| FLAG_Upstream_Fwd* | Amplify upstream of <i>pgtE</i> stop codon         | gggcgccatctccttgcatgACAAGGCGGGCGTAACAG | This study          |

|                        |                                                                            |                                                          |            |
|------------------------|----------------------------------------------------------------------------|----------------------------------------------------------|------------|
| FLAG_Upstream_Rev**    | for FLAG tag Gibson assembly                                               | <u>cttgtcatcgtcgctccttgtagtc</u> GAAGCGATACTG<br>CAACCCC | This study |
| FLAG_Downstream_Fwd*** | Amplify <i>pgtE</i> stop codon and downstream for FLAG tag Gibson assembly | <u>gactacaaggacgacgatgacaag</u> TAGACCACATCG<br>GGATGTC  | This study |
| FLAG_Downstream_Rev**  |                                                                            | <u>ggccatccagcctcgcgctcg</u> CCTGGAGCGACTTTCT<br>CTG     | This study |
| FLAG_Verification_Fwd  | Verify clean insertion of FLAG tag in <i>pgtE</i>                          | TTCCGGACGTCTCTCCTGAT                                     | This study |
| FLAG_Verification_Rev  |                                                                            | ACGCGATTATCTCTGGCTGG                                     | This study |

\* = restriction sites are underlined

\*\* = engineered sequence for pRDH10 homology are underlined

\*\*\* = engineered sequence for FLAG Tag are underlined

1053

1054
